# Supplementary material for: Seasonal variability of nitrous oxide concentrations and emissions in a temperate estuary
Source: Copernicus journal article supplement (doi:10.5194/bg-20-3229-2023), 2023-08-07
Supplement: Supplementary file 1 [file bg-20-3229-2023-supplement.pdf]

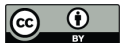

*Supplement of*

## **Seasonal variability of nitrous oxide concentrations and emissions in a temperate estuary**

**Gesa Schulz et al.**

*Correspondence to:* Gesa Schulz ([gesa.schulz@hereon.de](mailto:gesa.schulz@hereon.de))

The copyright of individual parts of the supplement might differ from the article licence.

1 **Table S1: Applied oxygen correction for each cruise: The corrections were made using the salinity corrected optode**  
 2 **measurements from the FerryBox (O2) in comparison with Winkler titrations. Changes in oxygen corrections arose due**  
 3 **to several optode changes in the time period from 2017 to 2022.**

| Cruise  | Correction        | Number of Winkler<br>titrations | R <sup>2</sup> |
|---------|-------------------|---------------------------------|----------------|
| 2017/08 | +24.05 ± 1.52     | 7                               |                |
| 2019/06 | +35.19 ± 5.97     | 9                               |                |
| 2019/07 | +35.19 ± 5.97     | 9                               |                |
| 2020/06 | -2.38             | 19                              | 0.99           |
| 2020/09 | -2.38             | 19                              | 0.99           |
| 2021/03 | 0.97 × O2 + 43.91 | 22                              | 0.94           |
| 2021/05 | 1.12 × O2 + 13.41 | 36                              | 0.97           |
| 2021/07 | 1.12 × O2 + 13.41 | 36                              | 0.97           |
| 2022/03 | 1.12 × O2 + 13.41 | 36                              | 0.97           |

4

5 **Table S2: Calculated average N<sub>2</sub>O saturation, sea-to-air fluxes calculated after different parametrizations and atmospheric N<sub>2</sub>O dry mole fractions during our cruises**

| Campaign Dates  | Average saturation (%) | N <sub>2</sub> O Flux densities ( $\mu\text{mol m}^{-2} \text{d}^{-1}$ ) |             |               |                   |             |               |                     |             |               |
|-----------------|------------------------|--------------------------------------------------------------------------|-------------|---------------|-------------------|-------------|---------------|---------------------|-------------|---------------|
|                 |                        | Nightingale et al. (2000)                                                |             |               | Wanninkhof (1992) |             |               | Clark et al. (1995) |             |               |
|                 |                        | In-situ wind                                                             | Annual wind | Seasonal wind | In-situ wind      | Annual wind | Seasonal wind | In-situ wind        | Annual wind | Seasonal wind |
| 28.-29.04.15    | 160.8 ± 37.9           | 20.9 ± 13.3                                                              | 9.2 ± 5.9   | 11.5 ± 7.3    | 24.3 ± 15.4       | 9.8 ± 6.2   | 12.6 ± 8.0    | 21.6 ± 13.7         | 10.4 ± 6.6  | 12.6 ± 8.0    |
| 02.-04.06.15    | 203.8 ± 112.7          | 16.6 ± 18.2                                                              | 14.9 ± 16.3 | 15.4 ± 16.9   | 17.8 ± 19.5       | 15.8 ± 17.2 | 16.4 ± 18.0   | 18.4 ± 20.1         | 16.8 ± 18.4 | 17.3 ± 19.0   |
| 01.-02.08.17    | 221.0 ± 106.5          | 10.9 ± 9.7                                                               | 17.3 ± 15.4 | 18.1 ± 16.2   | 10.7 ± 9.6        | 18.3 ± 16.3 | 19.3 ± 17.2   | 13.7 ± 12.2         | 19.5 ± 17.4 | 20.3 ± 18.1   |
| 04.-05.06.19    | 192.6 ± 66.0           | 10.1 ± 7.3                                                               | 13.4 ± 9.7  | 13.9 ± 10.0   | 10.3 ± 7.4        | 14.2 ± 10.2 | 14.8 ± 10.7   | 12.1 ± 8.7          | 15.1 ± 10.9 | 15.6 ± 11.3   |
| 30.07.-01.08.19 | 232.5 ± 155.3          | 15.0 ± 17.9                                                              | 18.3 ± 21.8 | 19.9 ± 23.7   | 15.4 ± 18.4       | 19.3 ± 23.1 | 21.3 ± 25.4   | 17.6 ± 21.0         | 20.6 ± 24.6 | 22.1 ± 26.4   |
| 19.-20.06.20    | 193.9 ± 74.1           | 19.4 ± 15.6                                                              | 13.3 ± 10.8 | 13.8 ± 11.2   | 21.5 ± 17.3       | 14.1 ± 11.4 | 14.7 ± 11.9   | 20.8 ± 16.7         | 15.1 ± 12.1 | 15.5 ± 12.5   |
| 09.-11.09.20    | 160.5 ± 53.6           | 13.1 ± 11.8                                                              | 8.7 ± 7.9   | 11.4 ± 10.3   | 14.6 ± 13.2       | 9.2 ± 8.4   | 12.5 ± 11.3   | 14.0 ± 12.6         | 9.9 ± 8.9   | 12.4 ± 11.2   |
| 10.-12.03.21    | 242.5 ± 141.6          | 80.1 ± 80.5                                                              | 23.2 ± 23.3 | 37.0 ± 37.1   | 96.3 ± 96.8       | 24.6 ± 24.7 | 41.4 ± 41.6   | 81.7 ± 82.1         | 26.2 ± 26.3 | 39.3 ± 39.4   |
| 04.-05.05.21    | 145.6 ± 28.8           | 33.5 ± 21.2                                                              | 7.1 ± 4.5   | 7.8 ± 4.9     | 41.2 ± 26.0       | 7.5 ± 4.7   | 8.4 ± 5.3     | 34.1 ± 21.5         | 8.0 ± 5.1   | 8.7 ± 5.5     |
| 27.-28.07.21    | 172.6 ± 37.2           | 12.4 ± 6.5                                                               | 10.4 ± 5.4  | 11.3 ± 5.9    | 13.4 ± 7.0        | 11.0 ± 5.7  | 12.1 ± 6.3    | 13.6 ± 7.1          | 11.7 ± 6.1  | 12.5 ± 6.6    |
| 01.-02.03.22    | 196.5 ± 47.0           | 6.8 ± 3.4                                                                | 15.6 ± 7.8  | 24.8 ± 12.4   | 6.3 ± 3.1         | 16.5 ± 8.2  | 27.8 ± 13.9   | 9.7 ± 4.8           | 17.6 ± 8.8  | 26.3 ± 13.2   |

6

7 **Table S3: Areas for different section of the Elbe estuary used for N<sub>2</sub>O emission estimates**

| Section     | Stream kilometer (km) | Area (km <sup>2</sup> ) |
|-------------|-----------------------|-------------------------|
| Limnic      | 585 – 615             | 8                       |
| Port        | 615 – 632             | 22                      |
| Oligohaline | 632 – 704             | 162                     |
| Mesohaline  | 704 – 727             | 110                     |
| Polyhaline  | 727 – 750             | 148                     |
| Total       | 585 – 750             | 450                     |

8

9 **Table S4: Annual DIN and TN loads calculated according to Pättsch and Lenhart (2011) from 2015 to 2021.**

10 **We used publicly available data provided by FGG Elbe (2022). For 2022, data is not publicly available yet.**

| Year | DIN (Gg yr <sup>-1</sup> ) | TN (Gg yr <sup>-1</sup> ) |
|------|----------------------------|---------------------------|
| 2015 | 41.4                       | 59.4                      |
| 2016 | 47.5                       | 60.3                      |
| 2017 | 53.9                       | 70.2                      |
| 2018 | 40.7                       | 51.1                      |
| 2019 | 36.7                       | 43.1                      |
| 2020 | 36.8                       | 44.5                      |
| 2021 | 55.0                       | 63.0                      |
| Mean | 44.6                       | 55.0                      |

11

12 **Table S5: Calculated average seasonal DIN and TN loads from 2015 to 2021**

| Season      | Months               | DIN (g d <sup>-1</sup> )                | TN (g d <sup>-1</sup> )                 |
|-------------|----------------------|-----------------------------------------|-----------------------------------------|
| Winter      | March                | $2.91 \times 10^8 \pm 1.05 \times 10^8$ | $3.34 \times 10^8 \pm 9.40 \times 10^7$ |
| Spring      | April and May        | $1.17 \times 10^8 \pm 6.24 \times 10^7$ | $1.58 \times 10^8 \pm 7.62 \times 10^7$ |
| Summer      | June and July        | $5.03 \times 10^7 \pm 3.36 \times 10^7$ | $7.37 \times 10^7 \pm 3.99 \times 10^7$ |
| Late summer | August and September | $4.33 \times 10^7 \pm 2.69 \times 10^7$ | $6.25 \times 10^7 \pm 3.58 \times 10^7$ |

13

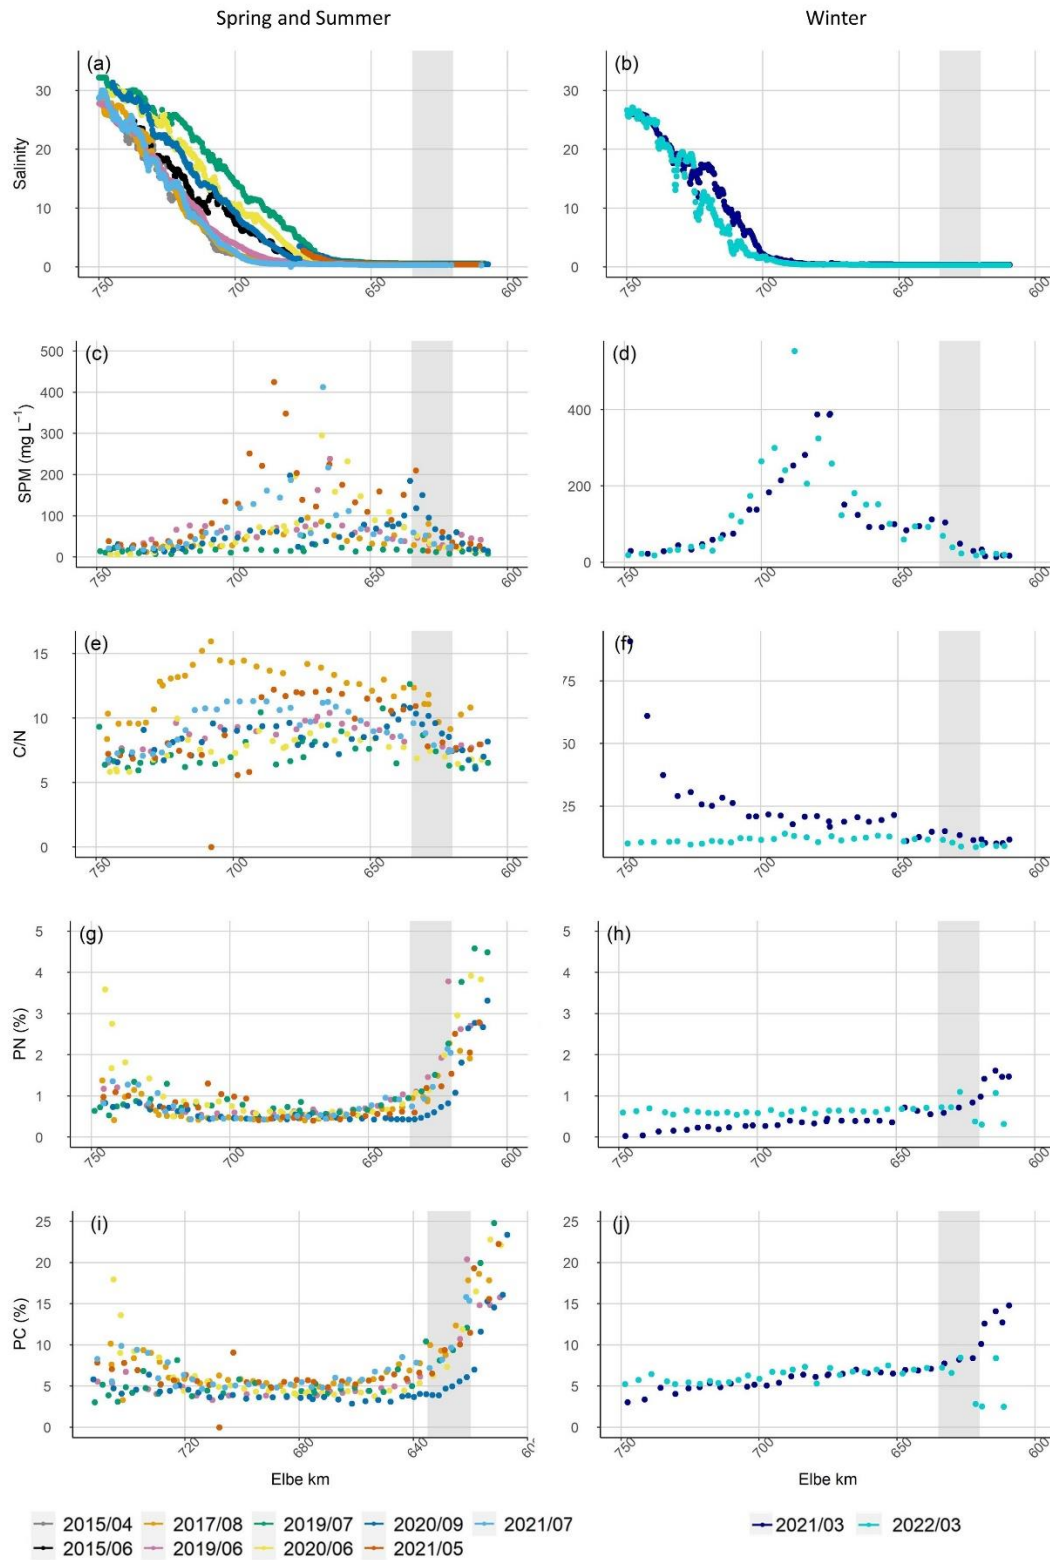

14

15 **Figure S1: Salinity along the Elbe estuary (a) in spring/summer and (b) in winter. Suspended particulate matter (SPM)**  
 16 **concentration in ( $\text{mg L}^{-1}$ ) along the Elbe estuary in (c) spring/summer and (d) in winter. Particulate carbon to nitrogen**  
 17 **ratio (C/N) along the Elbe estuary in (e) in spring/summer and (f) in winter. Particulate carbon (PN) content in (%)**  
 18 **in (g) spring/summer and (h) winter. Particulate nitrogen (PN) content in (%)**  
 19 **in (g) spring/summer and (h) winter. Particulate carbon (PC) content in (%) in (i) spring/summer and (j) winter. All**  
 20 **values are potted against stream kilometers. The Hamburg port region is shown with a gray background. C/N ratios**  
 21 **were measured with an Elemental Analyzer (Eurovector EA 3000) calibrated against a certified acetanilide standard**  
 22 **(IVA Analysentechnik, Germany). The standard deviation was 0.05% and 0.005% for carbon and nitrogen respectively.**  
**Please note that there are no data for the suspended particulate matter composition in 2015.**

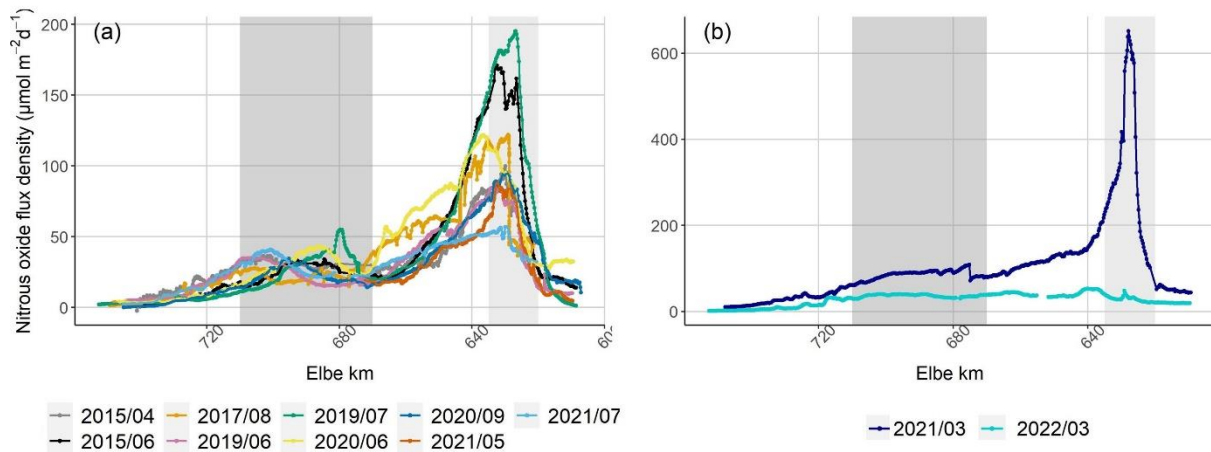

23  
24  
25  
26  
27

**Figure S2: Nitrous oxide flux density along the Elbe estuary calculated after Borges et al. (2004) and in-situ wind speeds (a) in spring and summer, (b) in winter. Light grey shading denotes the Hamburg Port region, dark grey shading the typical position of the maximum turbidity zone (MTZ, Bergemann, 2004). Note the difference in Y-axis scales for the plots.**

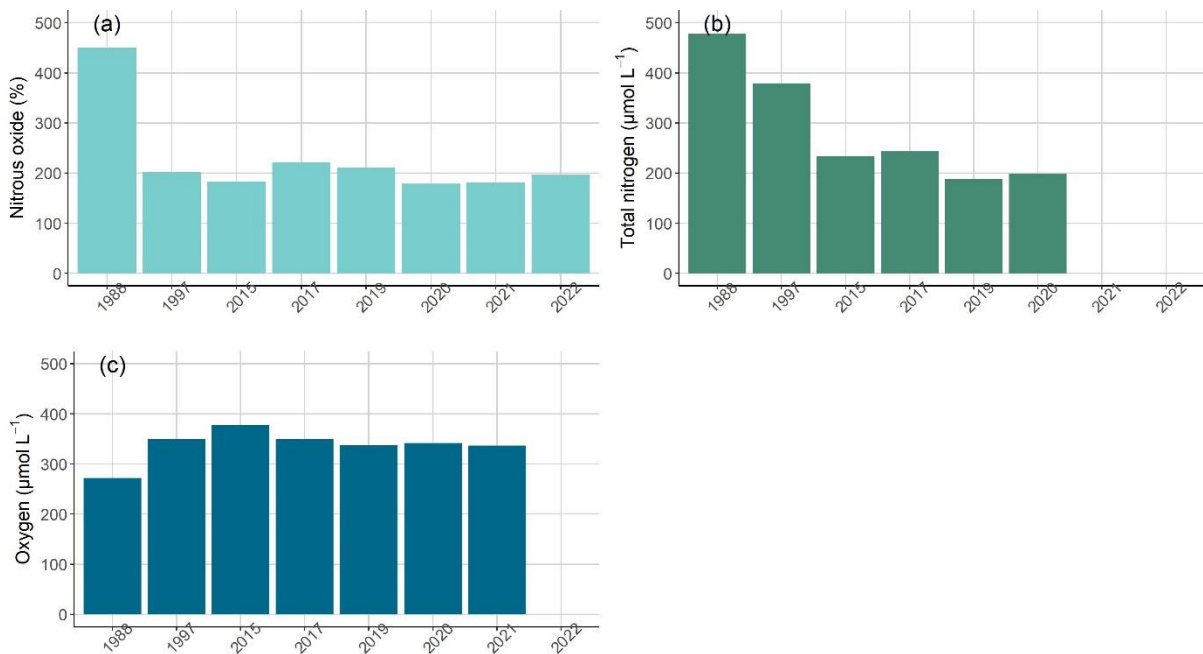

28  
29  
30  
31  
32  
33  
34  
35

**Figure S3: (a) Comparison of average  $\text{N}_2\text{O}$  saturation transect measurements with previous research from the Elbe Estuary, (b) the total nitrogen concentration and (c) oxygen concentration. Average annual oxygen concentration and total nitrogen concentration are shown for the station Zollenspieker at the beginning of the estuary (stream kilometer 598.7) and publicly available (Das Fachinformationssystem (FIS) der FGG Elbe, 2022). Values for 2022 and total nitrogen concentration for 2021 are not presented as the data is not publicly available yet.**

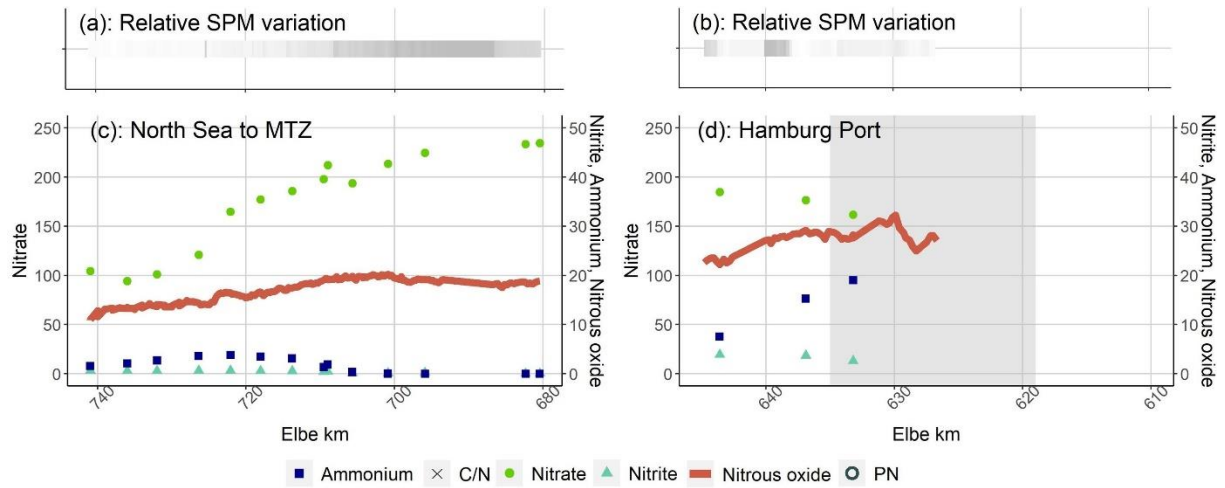

36

37 **Figure S4: Succession of N-bearing substances coming from the North Sea and in the Port of Hamburg in April 2015:**  
 38 **Relative change of SPM concentrations (a) from the North Sea and (b) in the Port of Hamburg. Nitrate in  $\mu\text{mol L}^{-1}$ ,**  
 39 **nitrite in  $\mu\text{mol L}^{-1}$ , ammonium in  $\mu\text{mol L}^{-1}$  and nitrous oxide concentrations in  $\text{nmol L}^{-1}$  plotted against stream**  
 40 **kilometers (c) from the North Sea and (d) in the Port of Hamburg. The grey area in (d) and (f) shows the position of the**  
 41 **Port of Hamburg.**

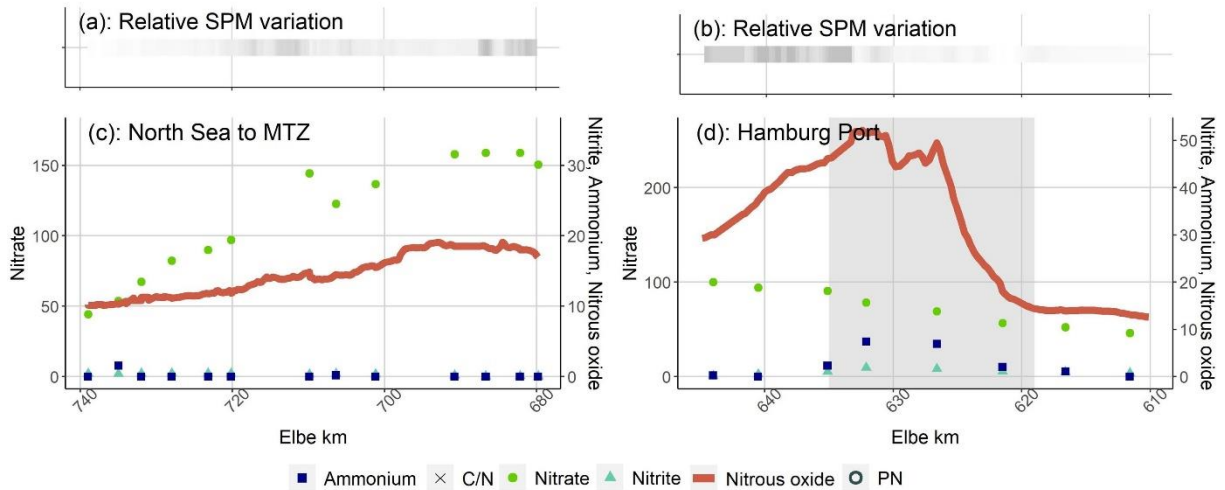

42

43 **Figure S5: Succession of N-bearing substances coming from the North Sea and in the Port of Hamburg in June 2015:**  
 44 **Relative change of SPM concentrations (a) from the North Sea and (b) in the Port of Hamburg. Nitrate in  $\mu\text{mol L}^{-1}$ ,**  
 45 **nitrite in  $\mu\text{mol L}^{-1}$ , ammonium in  $\mu\text{mol L}^{-1}$  and nitrous oxide concentrations in  $\text{nmol L}^{-1}$  plotted against stream**  
 46 **kilometers (c) from the North Sea and (d) in the Port of Hamburg. The grey area in (d) and (f) shows the position of the**  
 47 **Port of Hamburg.**

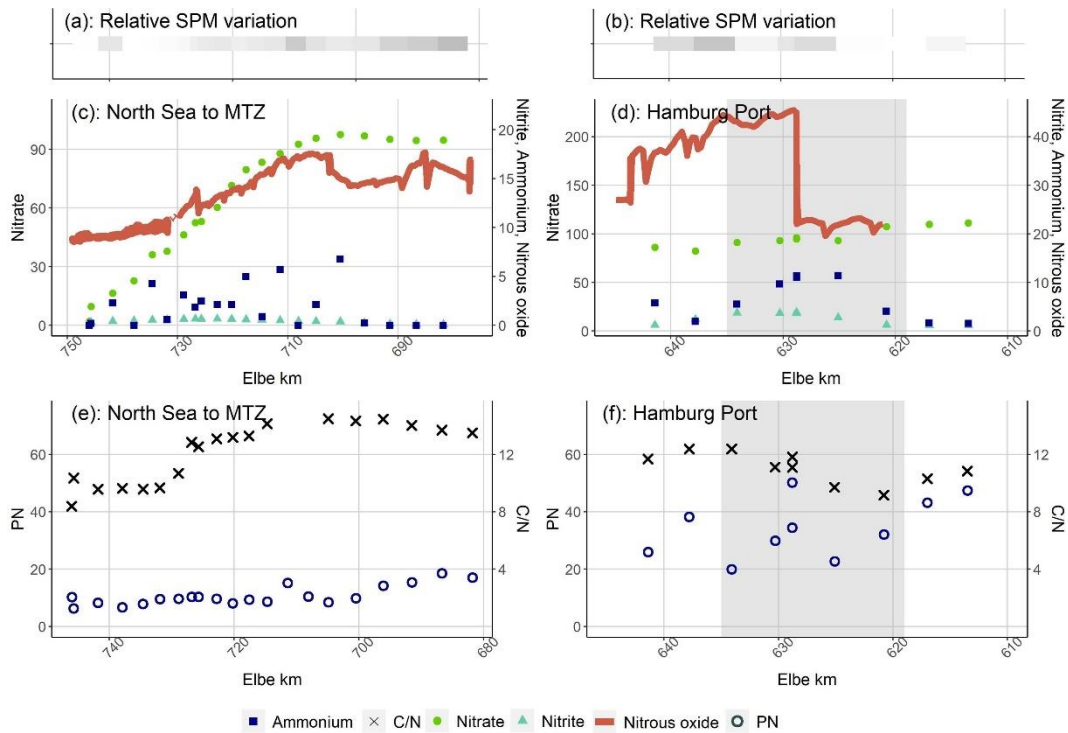

48

49 **Figure S6: Succession of N-bearing substances coming from the North Sea and in the Port of Hamburg in August 2017:**  
 50 **Relative change of SPM concentrations (a) from the North Sea and (b) in the Port of Hamburg. Nitrate in  $\mu\text{mol L}^{-1}$ ,**  
 51 **nitrite in  $\mu\text{mol L}^{-1}$ , ammonium in  $\mu\text{mol L}^{-1}$  and nitrous oxide concentrations in  $\text{nmol L}^{-1}$  plotted against stream**  
 52 **kilometers (c) from the North Sea and (d) in the Port of Hamburg. Particulate nitrogen concentrations in  $\mu\text{mol L}^{-1}$  and**  
 53 **C/N values plotted against stream kilometers (e) from the North Sea and (f) in the Port of Hamburg. The grey area in**  
 54 **(d) and (f) shows the position of the Port of Hamburg.**

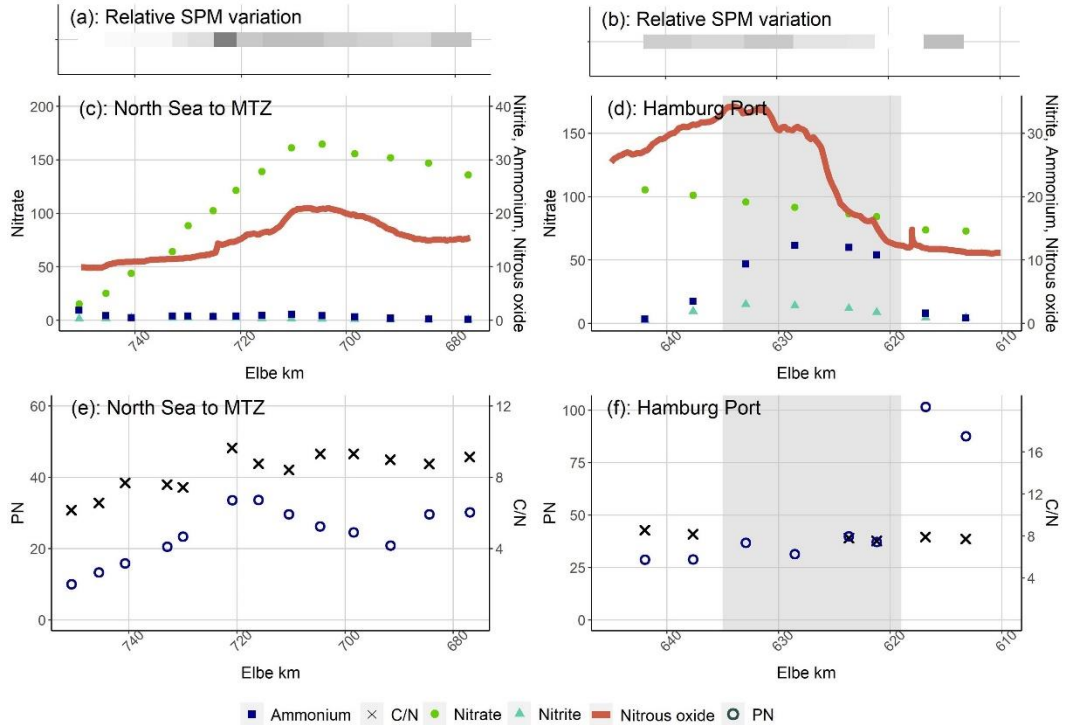

55

56 **Figure S7: Succession of N-bearing substances coming from the North Sea and in the Port of Hamburg in June 2019:**  
 57 **Relative change of SPM concentrations (a) from the North Sea and (b) in the Port of Hamburg. Nitrate in  $\mu\text{mol L}^{-1}$ ,**  
 58 **nitrite in  $\mu\text{mol L}^{-1}$ , ammonium in  $\mu\text{mol L}^{-1}$  and nitrous oxide concentrations in  $\text{nmol L}^{-1}$  plotted against stream**  
 59 **kilometers (c) from the North Sea and (d) in the Port of Hamburg. Particulate nitrogen concentrations in  $\mu\text{mol L}^{-1}$  and**  
 60 **C/N values plotted against stream kilometers (e) from the North Sea and (f) in the Port of Hamburg. The grey area in**  
 61 **(d) and (f) shows the position of the Port of Hamburg.**



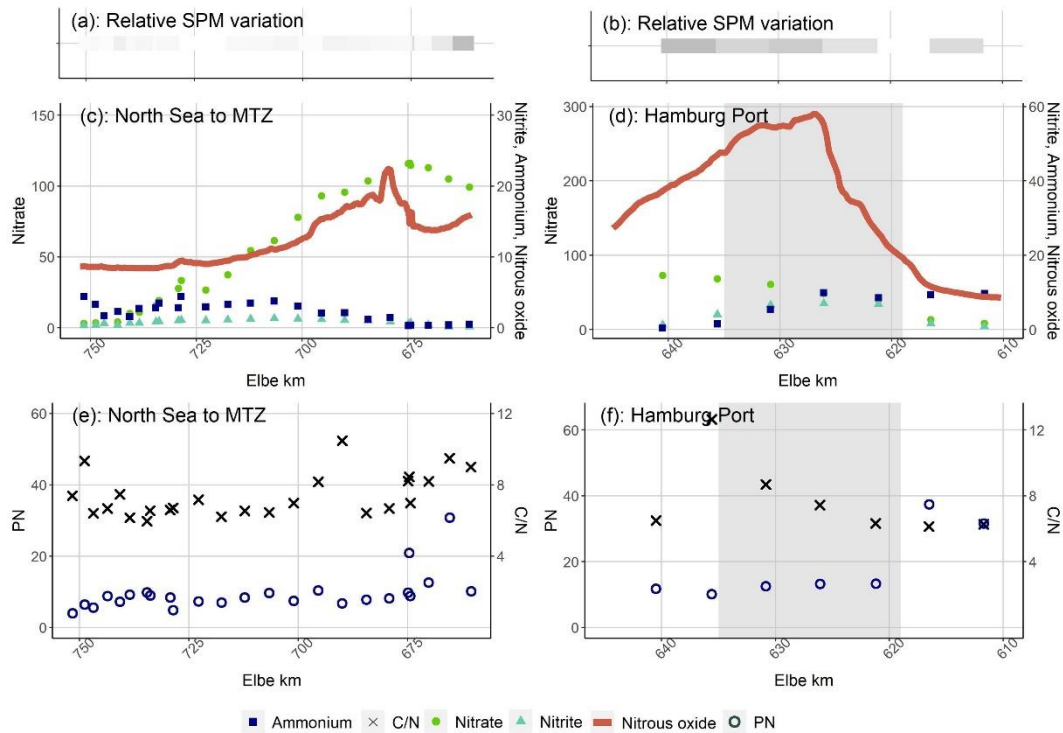

62

63 **Figure S8: Succession of N-bearing substances coming from the North Sea and in the Port of Hamburg in July 2019:**  
 64 **Relative change of SPM concentrations (a) from the North Sea and (b) in the Port of Hamburg. Nitrate in  $\mu\text{mol L}^{-1}$ ,**  
 65 **nitrite in  $\mu\text{mol L}^{-1}$ , ammonium in  $\mu\text{mol L}^{-1}$  and nitrous oxide concentrations in  $\text{nmol L}^{-1}$  plotted against stream**  
 66 **kilometers (c) from the North Sea and (d) in the Port of Hamburg. Particulate nitrogen concentrations in  $\mu\text{mol L}^{-1}$  and**  
 67 **C/N values plotted against stream kilometers (e) from the North Sea and (f) in the Port of Hamburg. The grey area in**  
 68 **(d) and (f) shows the position of the Port of Hamburg.**

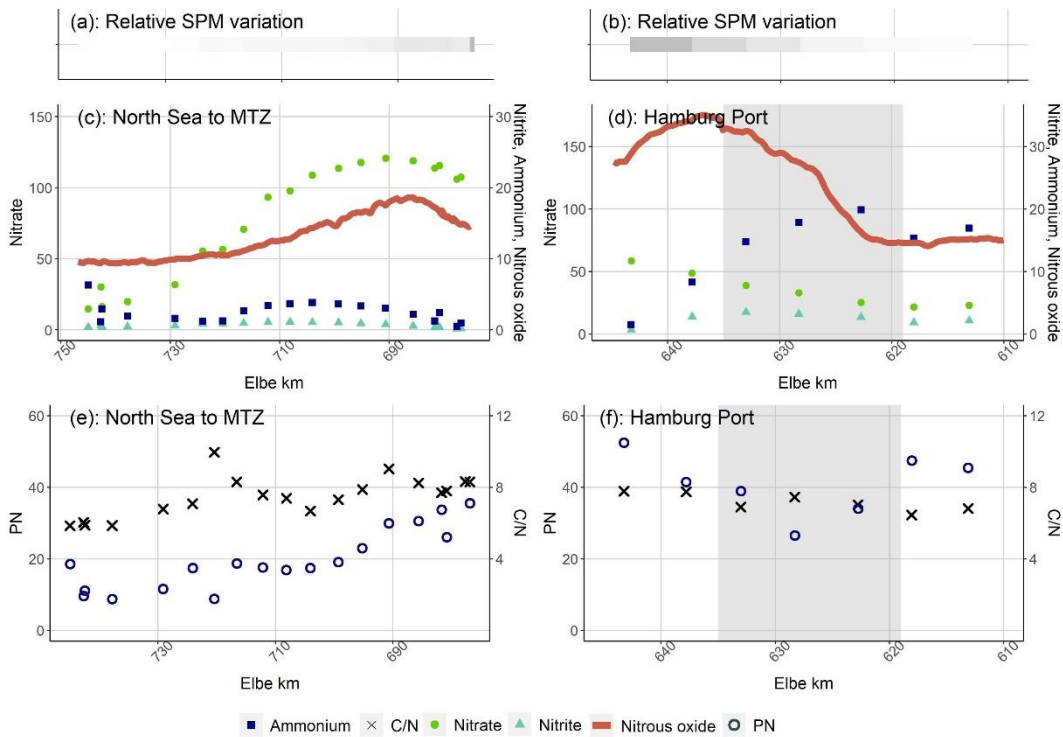

69

70 **Figure S9: Succession of N-bearing substances coming from the North Sea and in the Port of Hamburg in June 2020:**  
 71 **Relative change of SPM concentrations (a) from the North Sea and (b) in the Port of Hamburg. Nitrate in  $\mu\text{mol L}^{-1}$ ,**  
 72 **nitrite in  $\mu\text{mol L}^{-1}$ , ammonium in  $\mu\text{mol L}^{-1}$  and nitrous oxide concentrations in  $\text{nmol L}^{-1}$  plotted against stream**  
 73 **kilometers (c) from the North Sea and (d) in the Port of Hamburg. Particulate nitrogen concentrations in  $\mu\text{mol L}^{-1}$  and**  
 74 **C/N values plotted against stream kilometers (e) from the North Sea and (f) in the Port of Hamburg. The grey area in**  
 75 **(d) and (f) shows the position of the Port of Hamburg.**

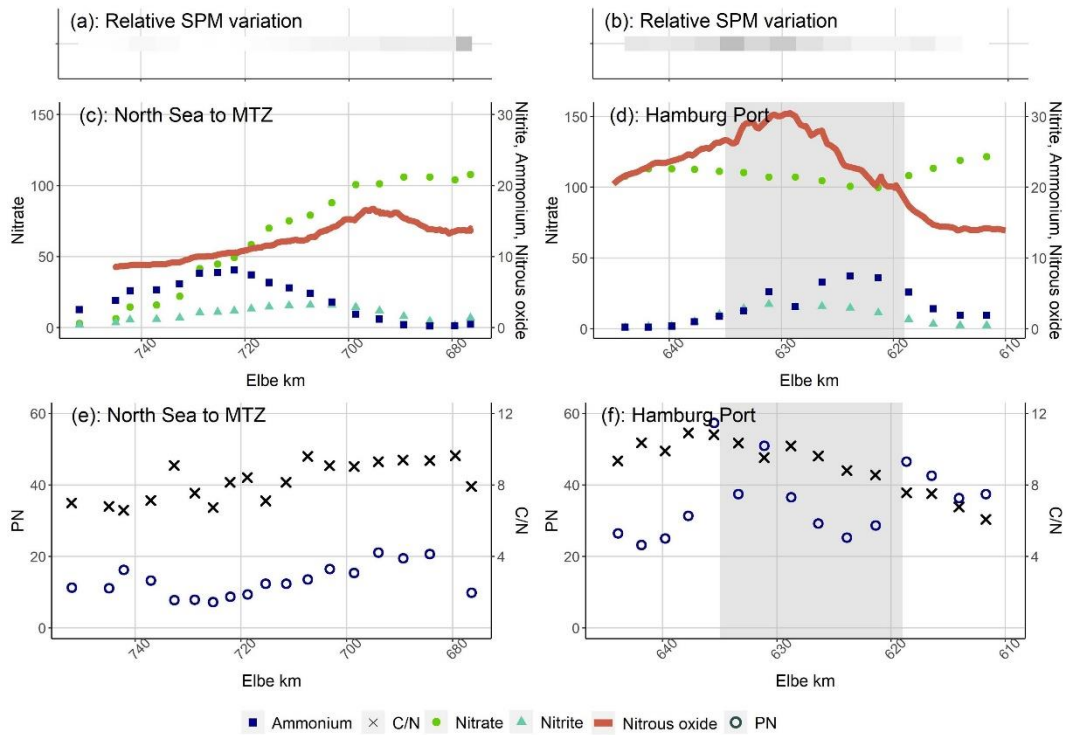

76

77 **Figure S10: Succession of N-bearing substances coming from the North Sea and in the Port of Hamburg in September**  
 78 **2020: Relative change of SPM concentrations (a) from the North Sea and (b) in the Port of Hamburg. Nitrate in**  
 79  **$\mu\text{mol L}^{-1}$ , nitrite in  $\mu\text{mol L}^{-1}$ , ammonium in  $\mu\text{mol L}^{-1}$  and nitrous oxide concentrations in  $\text{nmol L}^{-1}$  plotted against stream**  
 80 **kilometers (c) from the North Sea and (d) in the Port of Hamburg. Particulate nitrogen concentrations in  $\mu\text{mol L}^{-1}$  and**  
 81 **C/N values plotted against stream kilometers (e) from the North Sea and (f) in the Port of Hamburg. The grey area in**  
 82 **(d) and (f) shows the position of the Port of Hamburg.**

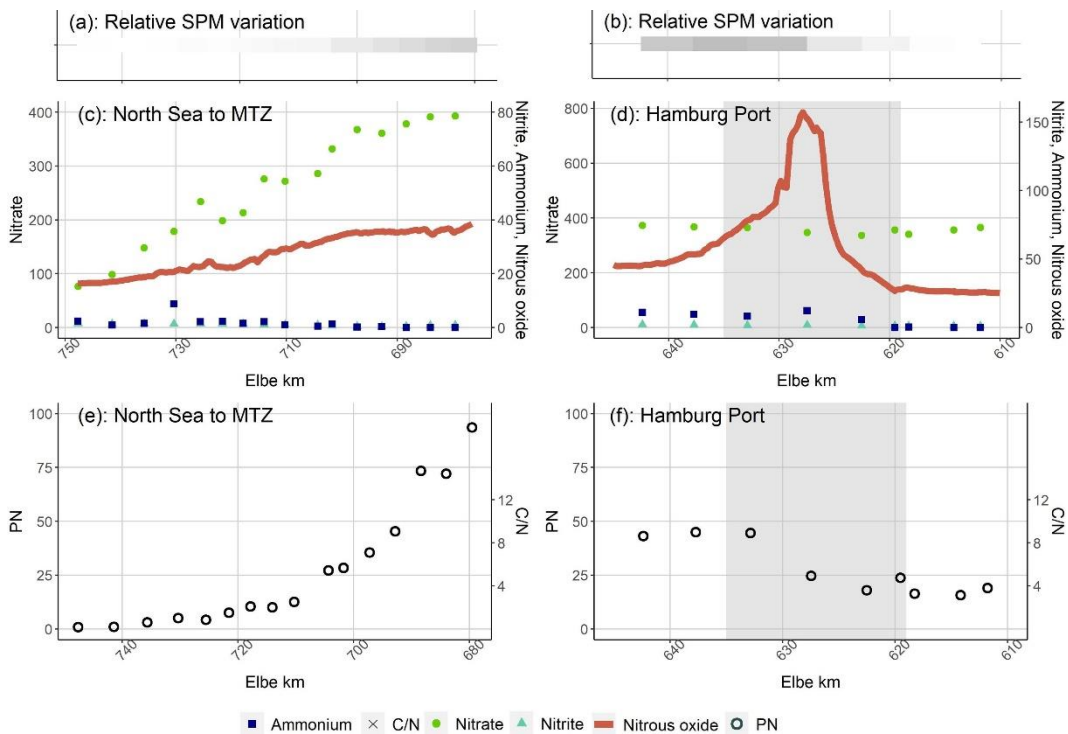

83

84 **Figure S11: Succession of N-bearing substances coming from the North Sea and in the Port of Hamburg in March 2021:**  
 85 **Relative change of SPM concentrations (a) from the North Sea and (b) in the Port of Hamburg. Nitrate in  $\mu\text{mol L}^{-1}$ ,**  
 86 **nitrite in  $\mu\text{mol L}^{-1}$ , ammonium in  $\mu\text{mol L}^{-1}$  and nitrous oxide concentrations in  $\text{nmol L}^{-1}$  plotted against stream**  
 87 **kilometers (c) from the North Sea and (d) in the Port of Hamburg. Particulate nitrogen concentrations in  $\mu\text{mol L}^{-1}$  and**  
 88 **C/N values plotted against stream kilometers (e) from the North Sea and (f) in the Port of Hamburg. The grey area in**  
 89 **(d) and (f) shows the position of the Port of Hamburg.**

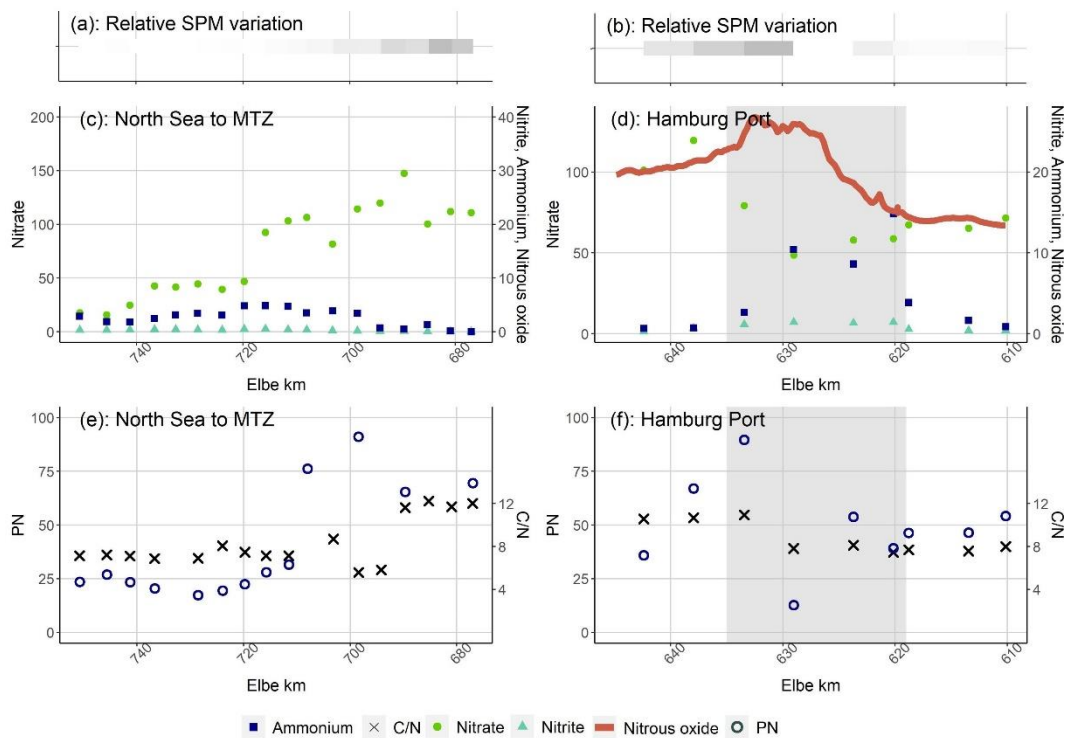

90

91 **Figure S12: Succession of N-bearing substances coming from the North Sea and in the Port of Hamburg in May 2021:**  
 92 **Relative change of SPM concentrations (a) from the North Sea and (b) in the Port of Hamburg. Nitrate in  $\mu\text{mol L}^{-1}$ ,**  
 93 **nitrite in  $\mu\text{mol L}^{-1}$ , ammonium in  $\mu\text{mol L}^{-1}$  and nitrous oxide concentrations in  $\text{nmol L}^{-1}$  plotted against stream**  
 94 **kilometers (c) from the North Sea and (d) in the Port of Hamburg. Particulate nitrogen concentrations in  $\mu\text{mol L}^{-1}$  and**  
 95 **C/N values plotted against stream kilometers (e) from the North Sea and (f) in the Port of Hamburg. The grey area in**  
 96 **(d) and (f) shows the position of the Port of Hamburg.**

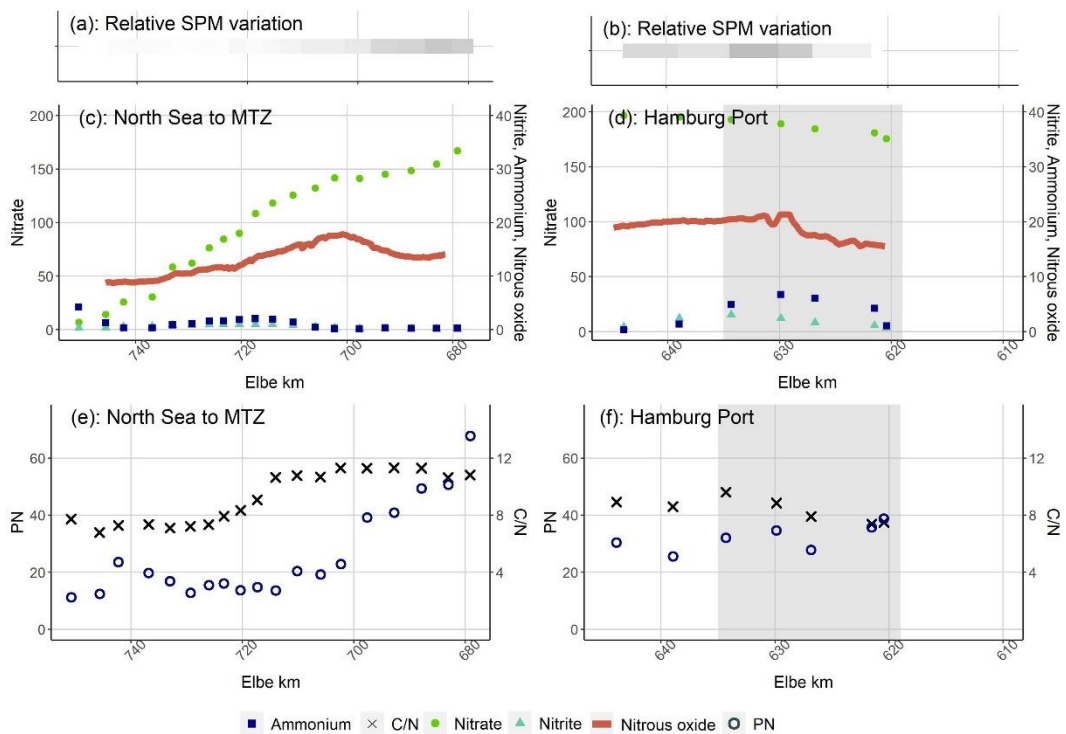

97

98 **Figure S13: Succession of N-bearing substances coming from the North Sea and in the Port of Hamburg in July 2021:**  
 99 **Relative change of SPM concentrations (a) from the North Sea and (b) in the Port of Hamburg. Nitrate in  $\mu\text{mol L}^{-1}$ ,**  
 100 **nitrite in  $\mu\text{mol L}^{-1}$ , ammonium in  $\mu\text{mol L}^{-1}$  and nitrous oxide concentrations in  $\text{nmol L}^{-1}$  plotted against stream**  
 101 **kilometers (c) from the North Sea and (d) in the Port of Hamburg. Particulate nitrogen concentrations in  $\mu\text{mol L}^{-1}$  and**  
 102 **C/N values plotted against stream kilometers (e) from the North Sea and (f) in the Port of Hamburg. The grey area in**  
 103 **(d) and (f) shows the position of the Port of Hamburg.**

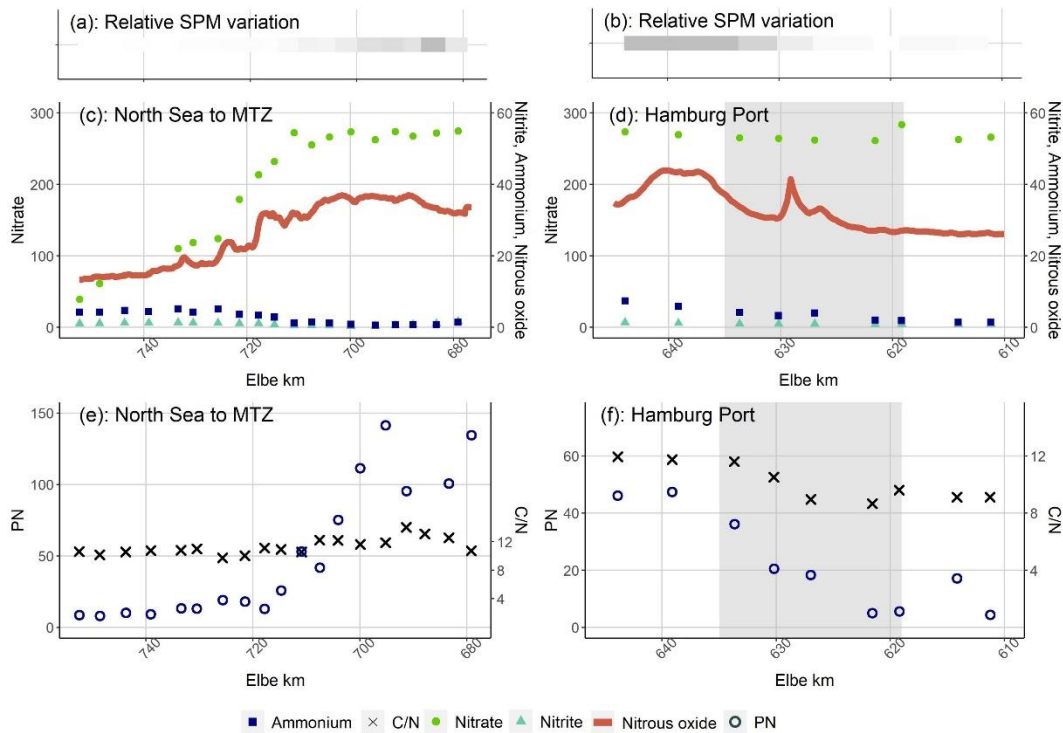

104

105 **Figure S14: Succession of N-bearing substances coming from the North Sea and in the Port of Hamburg in March 2022:**  
 106 **Relative change of SPM concentrations (a) from the North Sea and (b) in the Port of Hamburg. Nitrate in µmol L<sup>-1</sup>,**  
 107 **nitrite in µmol L<sup>-1</sup>, ammonium in µmol L<sup>-1</sup> and nitrous oxide concentrations in nmol L<sup>-1</sup> plotted against stream**  
 108 **kilometers (c) from the North Sea and (d) in the Port of Hamburg. Particulate nitrogen concentrations in µmol L<sup>-1</sup> and**  
 109 **C/N values plotted against stream kilometers (e) from the North Sea and (f) in the Port of Hamburg. The grey area in**  
 110 **(d) and (f) shows the position of the Port of Hamburg.**

111 **References**

112 Clark, J. F., Schlosser, P., Simpson, H. J., Stute, M., Wanninkhof, R., and Ho, D. T.: Relationship between gas  
 113 transfer velocities and wind speeds in the tidal Hudson River determined by the dual tracer technique, in: Air-  
 114 Water Gas Transfer, edited by: Jähne, B. and Monahan, E. C., AEON Verlag, Hanau, 785–800, 1995.

115 Das Fachinformationssystem (FIS) der FGG Elbe: [https://www.elbe-](https://www.elbe-datenportal.de/FisFggElbe/content/start/ZurStartseite.action;jsessionid=A37EDCF5B5EC1ECB15091447E64EC538)  
 116 [datenportal.de/FisFggElbe/content/start/ZurStartseite.action;jsessionid=A37EDCF5B5EC1ECB15091447E64EC](https://www.elbe-datenportal.de/FisFggElbe/content/start/ZurStartseite.action;jsessionid=A37EDCF5B5EC1ECB15091447E64EC538)  
 117 [538](https://www.elbe-datenportal.de/FisFggElbe/content/start/ZurStartseite.action;jsessionid=A37EDCF5B5EC1ECB15091447E64EC538), last access: 21 November 2022.

118 Pätsch, J. and Lenhart, H.-J.: Daily Loads of Nutrients, Total Alkalinity, Dissolved Inorganic Carbon and  
 119 Dissolved Organic Carbon of the European Continental Rivers for the Years 1977 – 2009, Institut für  
 120 Meereskunde der Universität Hamburg, Hamburg, DE, 2011.

121 Wanninkhof, R.: Relationship between wind speed and gas exchange over the ocean, *J. Geophys. Res. Oceans*,  
 122 *97*, 7373–7382, <https://doi.org/10.1029/92JC00188>, 1992.
